# Supplementary material for: Physical Inactivity and Sedentary Behaviour among Panamanian Adults: Results from the National Health Survey of Panama (ENSPA) 2019
Source: MDPI journal article supplement (doi:10.3390/ijerph20085554), 2023-04-18
Supplement: s1 [file s1]

**Manuscript:**

**Table S1.** Selected baseline characteristics of the excluded persons (missing and invalid data) aged 18–69 years by sex. Panama 2019.

| Sociodemographic characteristics                   | All     |                                | Men     |                                | Women   |                                |
|----------------------------------------------------|---------|--------------------------------|---------|--------------------------------|---------|--------------------------------|
|                                                    | N       | Weighted prevalence % (95% CI) | N       | Weighted prevalence % (95% CI) | N       | Weighted prevalence % (95% CI) |
| Age (years)                                        | 367,282 |                                | 181,868 | 49.5 (44.4–54.6)               | 185,414 | 50.5 (45.4–55.6)               |
| 18–29                                              | 74,679  | 20.3 (17.1–24.0)               | 27,330  | 15.0 (10.5–21.0)               | 47,350  | 25.5 (21.5–30.0)               |
| 30–39                                              | 98,720  | 26.9 (22.1–32.2)               | 49,812  | 27.4 (19.2–37.4)               | 48,908  | 26.4 (22.2–31.0)               |
| 40–49                                              | 79,073  | 21.5 (18.8–21.2)               | 41,867  | 23.0 (16.5–31.1)               | 37,206  | 20.1 (16.2–24.5)               |
| 50–59                                              | 63,173  | 17.2 (16.4–18.8)               | 34,855  | 19.2 (13.5–31.1)               | 28,317  | 15.3 (12.1–19.1)               |
| 60–69                                              | 51,638  | 14.1 (14.5–16.7)               | 28,005  | 15.4 (10.1–22.8)               | 23,633  | 12.8 (9.5–16.8)                |
| Living area                                        |         |                                |         |                                |         |                                |
| Urban                                              | 280,720 | 76.4 (73.2–79.3)               | 131,408 | 72.2 (66.5–77.4)               | 149,312 | 80.5 (77.9–82.9)               |
| Rural                                              | 75,540  | 20.6 (17.7–23.7)               | 45,074  | 24.8 (19.8–30.5)               | 30,466  | 16.4 (14.1–19.0)               |
| Indigenous                                         | 11,023  | 3.0 (2.5–3.5)                  | 5 387   | 3.0 (2.3–3.9)                  | 5 636   | 3.0 (2.6–3.6)                  |
| Highest education level achieved                   |         |                                |         |                                |         |                                |
| No formal schooling/special or primary (0–6 years) | 70,528  | 20.0 (16.3–24.3)               | 40,119  | 22.5 (16.3–30.3)               | 30,409  | 17.4 (13.9–21.5)               |
| Secondary/short-cycle or other (7–13 years)        | 210,571 | 59.7 (54.5–64.7)               | 105,583 | 59.3 (50.3–67.7)               | 104,989 | 60.1 (54.9–61.1)               |
| University (> =13 years)                           | 71,690  | 20.3 (16.4–24.9)               | 32,386  | 18.2 (12.2–26.3)               | 39,304  | 22.5 (18.3–27.4)               |
| Ethnic group                                       |         |                                |         |                                |         |                                |
| Afro-Panamanian                                    | 81,962  | 23.1 (18.1–29.0)               | 46,234  | 25.9 (17.3–36.8)               | 35,728  | 20.3 (16.4–25.0)               |
| Multiracial                                        | 154,579 | 43.6 (38.7–48.7)               | 74,568  | 41.7 (33.5–50.5)               | 80,010  | 45.5 (40.5–50.7)               |
| Indigenous                                         | 38,146  | 10.8 (8.5–13.6)                | 17,560  | 9.8 (6.4–14.7)                 | 20,586  | 11.7 (9.1–15.0)                |
| Caucasian                                          | 74,086  | 20.9 (17.1–25.3)               | 37,639  | 21.1 (14.9–28.9)               | 36,447  | 20.7 (16.8–25.4)               |
| Asian and others                                   | 5 559   | 1.6 (0.7–3.4)                  | 2 636   | 1.5 (0.4–5.8)                  | 2 924   | 1.7 (0.8–3.5)                  |
| BMI                                                |         |                                |         |                                |         |                                |
| Underweight                                        | 7 694   | 2.3 (1.4–3.8)                  | 2 437   | 1.5 (0.5–4.3)                  | 5 256   | 3.1 (1.8–5.3)                  |
| Normal                                             | 77,889  | 23.6 (19.6–28.2)               | 40,741  | 25.5 (18.6–33.8)               | 37,149  | 21.9 (17.8–26.6)               |
| Overweight                                         | 120,000 | 36.4 (31.0–42.2)               | 70,006  | 43.8 (34.2–53.9)               | 49,994  | 29.5 (24.9–34.4)               |
| Obesity                                            | 123,800 | 37.6 (32.8–42.7)               | 46,541  | 29.1 (21.5–38.2)               | 77,259  | 45.5 (40.3–50.8)               |
| Self-perception of health status                   |         |                                |         |                                |         |                                |
| Very good or good                                  | 319,726 | 90.3 (87.4–92.5)               | 166,127 | 93.0 (88.8–95.7)               | 153,600 | 87.5 (83.3–90.7)               |
| Very bad or bad                                    | 34,505  | 9.7 (7.5–12.6)                 | 12,500  | 7.0 (4.3–11.2)                 | 22,005  | 12.5 (9.3–16.7)                |
| Smoking                                            |         |                                |         |                                |         |                                |
| Yes                                                | 38,359  | 10.8 (8.0–14.5)                | 27,472  | 15.4 (10.3–22.3)               | 10,887  | 6.2 (4.1–9.4)                  |
| No                                                 | 315,384 | 89.2 (85.5–92.0)               | 150,902 | 84.6 (77.7–89.6)               | 164,492 | 93.8 (90.6–95.9)               |
| Alcohol consumption                                |         |                                |         |                                |         |                                |
| Yes                                                | 119,346 | 32.5 (27.5–37.9)               | 78,843  | 43.4 (34.6–52.6)               | 40,503  | 21.8 (17.9–26.4)               |
| No                                                 | 247,743 | 67.5 (62.1–72.5)               | 102,831 | 56.6 (47.4–65.4)               | 144,911 | 78.2 (73.6–82.1)               |

Source: National Health Survey for Panama (ENSPA) 2019. Percentages are based on weighted data.

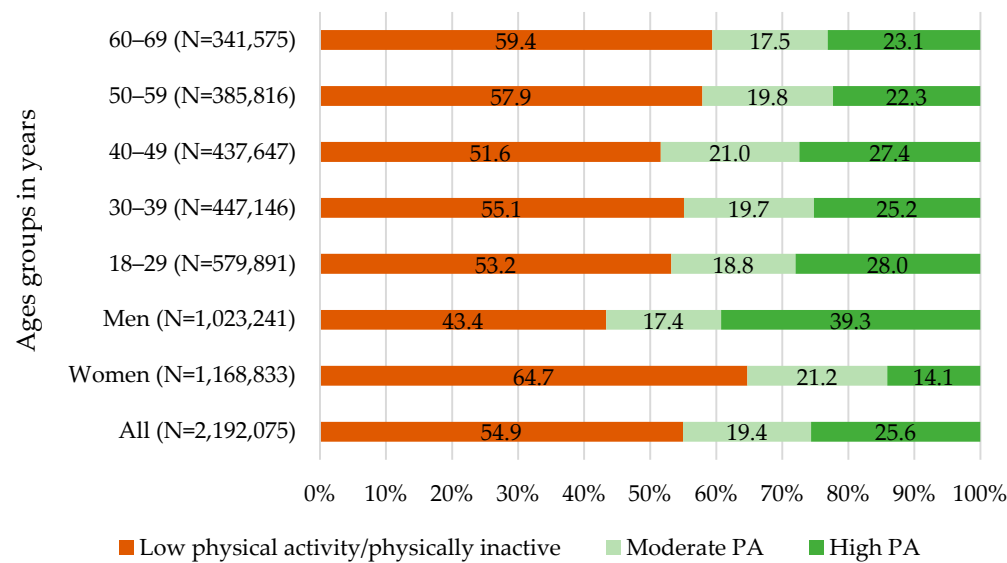

**Figure S1.** Weighted prevalence of low physical activity category/physically inactive and physical activity (PA) categories stratified by age. Panama, 2019.

**Table S2.** No physical activity by domain and in any domain and no vigorous-intensity physical activity stratified by age in years old (yo). Panama, 2019.

| Domain                      | All<br>N = 2,192,075<br>Weighted<br>prevalence<br>% (95% CI) | 18–29 yo<br>N = 579,891<br>Weighted<br>prevalence<br>% (95% CI) | 30–39 yo<br>N = 447,146<br>Weighted<br>prevalence<br>% (95% CI) | 40–49 yo<br>N = 437,647<br>Weighted<br>prevalence<br>% (95% CI) | 50–59 yo<br>N = 385,816<br>Weighted<br>prevalence<br>% (95% CI) | 60–69 yo<br>N = 341,575<br>Weighted<br>prevalence<br>% (95% CI) |
|-----------------------------|--------------------------------------------------------------|-----------------------------------------------------------------|-----------------------------------------------------------------|-----------------------------------------------------------------|-----------------------------------------------------------------|-----------------------------------------------------------------|
| Transport                   | 48.7 (47.2–50.2)                                             | 47.1 (43.9–50.3)                                                | 48.5 (45.3–51.7)                                                | 46.7 (43.3–50.2)                                                | 53.0 (49.3–56.6)                                                | 49.3 (45.4–53.2)                                                |
| Work / household            | 80.0 (78.8–81.2)                                             | 81.5 (79.1–83.7)                                                | 80.4 (77.9–82.7)                                                | 76.5 (73.4–79.3)                                                | 80.0 (76.8–82.8)                                                | 81.6 (78.7–84.2)                                                |
| Exercise & Sports           | 82.6 (81.4–83.8)                                             | 75.0 (72.2–77.6)                                                | 81.3 (78.4–83.9)                                                | 84.5 (81.9–86.8)                                                | 87.6 (84.8–90.0)                                                | 89.2 (86.7–91.2)                                                |
| In any domain               | 40.2 (38.7–41.8)                                             | 39.0 (35.9–42.3)                                                | 39.8 (36.6–43.1)                                                | 37.1 (33.9–40.5)                                                | 43.2 (39.5–47.0)                                                | 43.5 (39.7–47.4)                                                |
| Intensity                   |                                                              |                                                                 |                                                                 |                                                                 |                                                                 |                                                                 |
| No Vigorous<br>Intensity PA | 77.4 (76.1–78.7)                                             | 73.8 (71.0–76.5)                                                | 76.6 (73.6–79.3)                                                | 76.2 (73.0–79.1)                                                | 79.9 (76.5–83.0)                                                | 83.6 (80.8–86.1)                                                |

Source: National Health Survey for Panama (ENSPA) 2019. CI: Confidence interval.

**Table S3.** Median and interquartile range (IQR) of minutes spent engaged in sedentary behaviour on average per day by sex among participants aged 18–69 years. Panama, 2019.

| Sociodemographic characteristics | Minutes spent in sedentary behaviour on average per day by sex |                              |                |                              |                |                              |
|----------------------------------|----------------------------------------------------------------|------------------------------|----------------|------------------------------|----------------|------------------------------|
|                                  | Both                                                           |                              | Male           |                              | Female         |                              |
|                                  | N<br>2,191,889                                                 | Median (IQR)<br>120 (60–240) | N<br>1,023,143 | Median (IQR)<br>120 (60–240) | N<br>1,168,745 | Median (IQR)<br>120 (60–240) |
| Age (years)                      |                                                                |                              |                |                              |                |                              |
| 18–29                            | 579,890                                                        | 120 (60–240)                 | 244,669        | 120 (60–240)                 | 335,221        | 120 (60–240)                 |
| 30–39                            | 447,101                                                        | 120 (50–180)                 | 188,236        | 120 (60–240)                 | 258,864        | 120 (45–180)                 |
| 40–49                            | 437,505                                                        | 120 (45–180)                 | 215,452        | 120 (60–240)                 | 222,052        | 120 (60–240)                 |
| 50–59                            | 385,815                                                        | 120 (40–180)                 | 192,599        | 120 (60–180)                 | 193,215        | 120 (45–240)                 |
| 60–69                            | 341,575                                                        | 120 (45–180)                 | 182,184        | 120 (60–240)                 | 159,390        | 120 (60–180)                 |
| Area                             |                                                                |                              |                |                              |                |                              |
| Urban                            | 1,400,736                                                      | 120 (60–240)                 | 647,406        | 120 (60–240)                 | 753,329        | 120 (60–240)                 |
| Rural                            | 661,117                                                        | 120 (45–180)                 | 314,572        | 120 (60–240)                 | 346,544        | 90 (30–180)                  |
| Indigenous                       | 130,035                                                        | 60 (30–120)                  | 61,164         | 60 (30–120)                  | 68,870         | 60 (30–120)                  |
| Schooling                        |                                                                |                              |                |                              |                |                              |
| No formal                        |                                                                |                              |                |                              |                |                              |
| schooling/special or             | 551,765                                                        | 90 (40–180)                  | 257,108        | 105 (60–180)                 | 294,656        | 90 (30–180)                  |
| primary                          |                                                                |                              |                |                              |                |                              |
| Secondary/short-cycle or         | 1,235,036                                                      | 120 (60–240)                 | 595,320        | 120 (60–240)                 | 639,715        | 120 (60–240)                 |
| other                            |                                                                |                              |                |                              |                |                              |
| University                       | 397,067                                                        | 180 (60–300)                 | 165,606        | 180 (60–360)                 | 231,460        | 180 (60–300)                 |
| Body Mass Index (BMI)            |                                                                |                              |                |                              |                |                              |
| Underweight                      | 44,308                                                         | 120 (60–240)                 | 22,679         | 180 (60–240)                 | 21,629         | 120 (60–300)                 |
| Normal                           | 473,459                                                        | 120 (60–240)                 | 251,182        | 120 (60–240)                 | 222,277        | 120 (60–240)                 |
| Overweight                       | 688,819                                                        | 120 (60–240)                 | 339,893        | 120 (60–240)                 | 348,926        | 120 (60–180)                 |
| Obesity                          | 734,064                                                        | 120 (60–240)                 | 271,777        | 120 (60–240)                 | 462,286        | 120 (60–240)                 |
| Self-perception of health status |                                                                |                              |                |                              |                |                              |
| Very good or good                | 1,942,961                                                      | 120 (60–240)                 | 929,281        | 120 (60–240)                 | 1,013,680      | 120 (60–240)                 |
| Very bad or bad                  | 247,564                                                        | 120 (60–300)                 | 93,067         | 120 (60–300)                 | 154,496        | 120 (60–300)                 |
| Ethnic group                     |                                                                |                              |                |                              |                |                              |
| Caucasian                        | 399,039                                                        | 120 (60–240)                 | 183,821        | 120 (60–300)                 | 215,218        | 120 (60–240)                 |
| Afro-Panamanian                  | 335,915                                                        | 120 (60–240)                 | 172,998        | 120 (60–240)                 | 162,916        | 120 (60–240)                 |
| Mixed ethnicities                | 1,133,402                                                      | 120 (60–240)                 | 528,794        | 120 (60–240)                 | 604,607        | 120 (60–240)                 |
| Indigenous                       | 257,751                                                        | 60 (30–180)                  | 110,547        | 60 (30–120)                  | 147,203        | 90 (30–180)                  |
| Asian and others                 | 64,417                                                         | 120 (20–180)                 | 26,186         | 120 (60–180)                 | 38,230         | 60 (5–180)                   |
| Ever tobacco consumption         |                                                                |                              |                |                              |                |                              |
| No                               | 1,994,773                                                      | 120 (60–240)                 | 862,460        | 120 (60–240)                 | 1,132,312      | 120 (60–240)                 |
| Yes                              | 194,915                                                        | 120 (60–240)                 | 159,887        | 120 (60–240)                 | 35,027         | 120 (60–240)                 |
| Ever alcohol consumption         |                                                                |                              |                |                              |                |                              |
| No                               | 1,443,023                                                      | 120 (60–180)                 | 539,012        | 120 (60–180)                 | 904,010        | 120 (60–180)                 |
| Yes                              | 748,865                                                        | 120 (60–240)                 | 484,130        | 120 (60–240)                 | 264,735        | 120 (60–300)                 |

Source: National Health Survey for Panama (ENSPA) 2019.

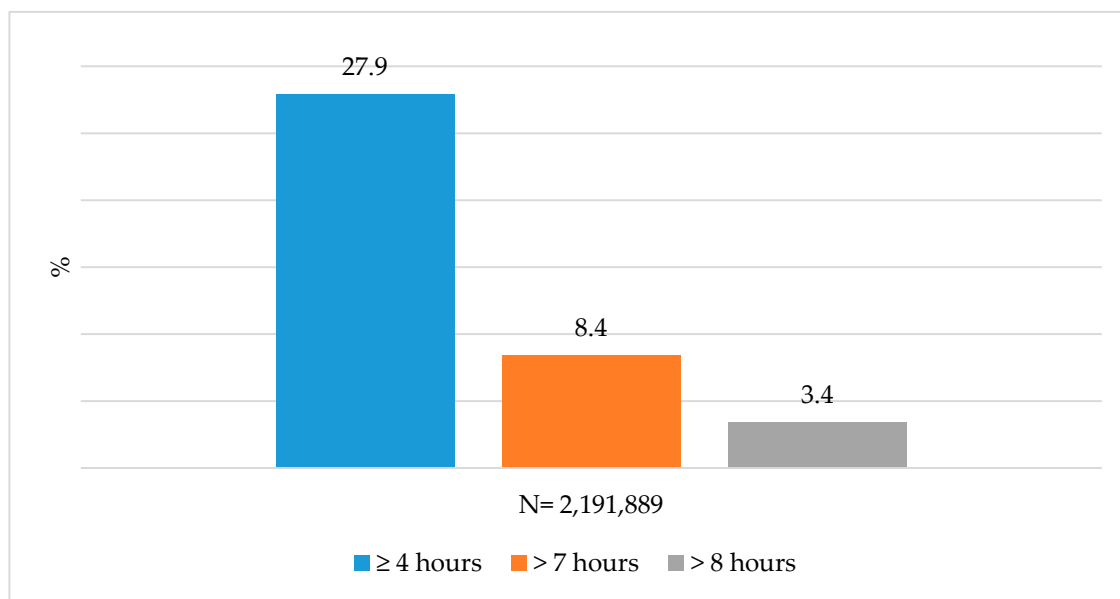

**Figure S2.** Weighted prevalence of sedentary behaviour according to different cut-off points among participants aged 18–69 years. Panama, 2019.
